# Supplementary material for: Light- and pH-dually responsive dendrimer-star copolymer containing spiropyran groups: synthesis, self-assembly and controlled drug release
Source: Royal Society of Chemistry journal article supplement (doi:10.1039/c8py00721g), 2018-01-01
Supplement: c8py00721g1.pdf [file c8py00721g1.pdf]

Electronic Supplementary Information for:

**Light- and pH-dually responsive dendrimer-star copolymer  
containing spiropyran groups: synthesis, self-assembly and  
controlled drug release**

Weizhong Yuan<sup>a\*</sup>, Xueyuan Gao<sup>a</sup>, Erli Pei<sup>a\*</sup> and Zhihong Li<sup>b\*</sup>

*<sup>a</sup>School of Materials Science and Engineering, Department of General Surgery, Yangpu Hospital Affiliated to Tongji University, School of Medicine, Tongji University, Shanghai 201804, P. R. China.*

*<sup>b</sup>Division of General Surgery, Shanghai Pudong New District Zhoupu Hospital, Shanghai 201200, P. R. China.*

**Table S1** Summary of the synthesized polymers

| Sample                                  | $M_{n,NMR}^a$ | $M_{n,GPC}^b$ | $M_w/M_n^b$ |
|-----------------------------------------|---------------|---------------|-------------|
| DPCL-OH                                 | 23660         | 19150         | 1.26        |
| DPCL- <i>b</i> -P <i>t</i> BMA          | 117040        | 112600        | 1.29        |
| DPCL- <i>b</i> -P(MAA- <i>co</i> -SPMA) | 188700        | 174310        | 1.31        |

<sup>a</sup> Determined by  $^1H$  NMR spectroscopy of the block copolymers.

<sup>b</sup> Determined by GPC analysis with polystyrene standards. THF was used as eluent.

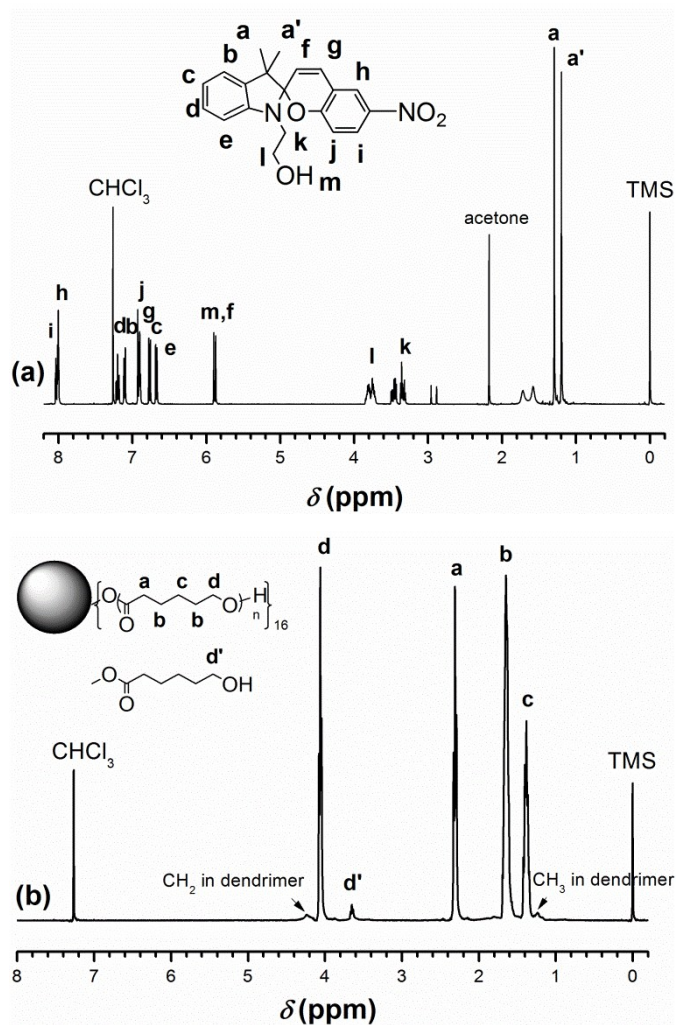

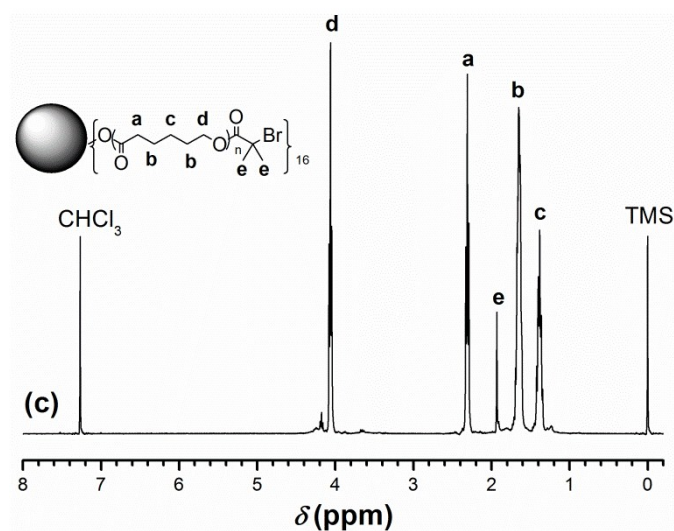

**Fig. S1**  $^1\text{H NMR}$  spectra of (a) SP-OH, (b) DPCL-OH and (c) DPCL-Br.

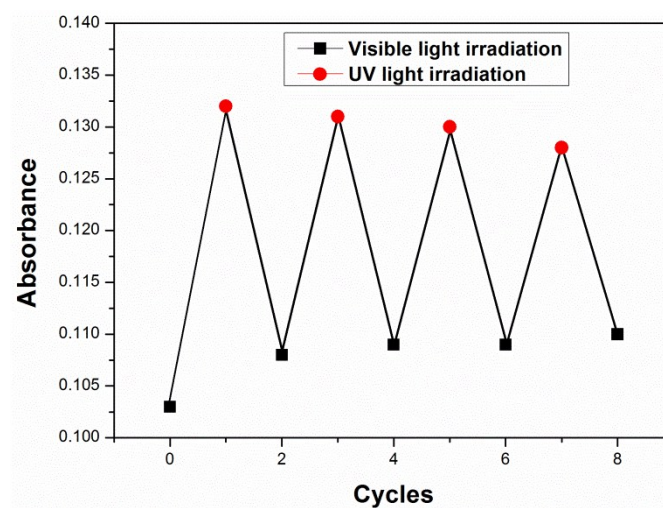

**Fig. S2** Alternately irradiation with UV lights (60 s) and visible light (60 min) for several cycles.

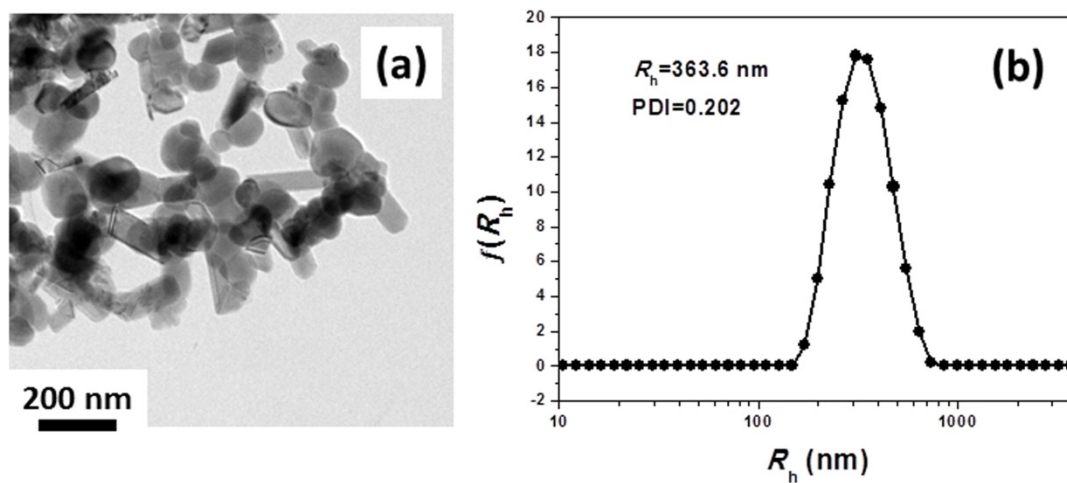

**Fig. S3** (a) TEM images of DOX-loaded copolymer micelles at pH=7 and (b) hydrodynamic radius ( $R_h$ ) of DOX-loaded copolymer micelles at pH=7.
